# Supplementary material
Source: Research Square preprint supplement (doi:10.21203/rs.3.rs-10057852/v1)
Supplement: Supplementary file 1 [file 5f554aaad97dbe7c04cd8151.xlsx]

## Sheet: Metabolites
metabolite_name	Gini coefficient	Pharmaceutical_drug or food-derived substnce
metronidazole	0.999111	1
cephalexin	0.999111	1
metoclopramide	0.999102	1
carbamazepine 10,11-epoxide	0.998273	1
cimetidine	0.997711	1
guanosine	0.997562	0
pioglitazone	0.997333	1
morphine	0.997091	1
N-acetyl sulfapyridine	0.99709	1
levetiracetam	0.995868	1
enalaprilat*	0.994459	1
quinine	0.993476	1
pivaloylcarnitine (C5)	0.993087	1
lidocaine	0.993042	1
norbenzoylecgonine*	0.992227	1
famotidine	0.991249	1
lamotrigine	0.989391	1
pseudoephedrine	0.988746	1
atenolol	0.988083	1
triamterene	0.987935	1
benzoylecgonine	0.986366	1
guaifenesin	0.984742	1
O-desmethyltramadol	0.983609	1
ranitidine N-oxide*	0.982284	1
tramadol	0.981015	1
alpha-hydroxymetoprolol	0.980714	1
O-desmethyltramadol glucuronide	0.9787	1
ranitidine	0.977692	1
O-desmethylvenlafaxine	0.976703	1
trazadone	0.970717	1
theanine	0.9556	1
3-(cystein-S-yl)acetaminophen*	0.906901	1
anthranilate	0.848047	0
dimethyl sulfone	0.735219	1
metformin	0.618667	1
2-piperidinone	0.612592	1
stachydrine	0.596899	1
beta-guanidinopropanoate	0.591111	0
hydroxycotinine	0.586667	1
pyridoxal	0.579313	0
S-allylcysteine	0.54405	0
metoprolol acid metabolite*	0.540444	1
N1,N12-diacetylspermine	0.495111	0
tryptophan betaine	0.4818	0
3-hydroxystachydrine*	0.474667	1
ectoine	0.461074	1
3-methylglutarylcarnitine (2)	0.459019	0
caffeine	0.457173	1
(R)-3-hydroxybutyrylcarnitine	0.453758	0
7-methylxanthine	0.451229	0
imidazole propionate	0.448633	0
5-hydroxymethyl-2-furoylcarnitine*	0.442667	0
4-imidazoleacetate	0.427556	0
phenylacetylcarnitine	0.426137	0
adenosine 5'-monophosphate (AMP)	0.423509	0
indoleacetoylcarnitine*	0.416561	0
trigonelline (N'-methylnicotinate)	0.416429	0
suberoylcarnitine (C8-DC)	0.413385	0
N-acetyl-1-methylhistidine*	0.408166	1
prolylglycine	0.40426	0
theobromine	0.401548	1
pipecolate	0.400599	1
cystathionine	0.399487	0
benzoylcarnitine*	0.383111	0
4-hydroxyglutamate	0.380513	0
ergothioneine	0.375467	1
indolin-2-one	0.369778	1
7-methylurate	0.368891	0
4-hydroxyphenylacetoylcarnitine	0.367607	0
N-methylhydroxyproline**	0.365885	0
gamma-glutamylalanine	0.363937	0
acetoacetate	0.360889	0
S-methylcysteine sulfoxide	0.355892	0
nicotinamide riboside	0.355556	0
homocitrulline	0.35471	0
lanthionine	0.352	0
N6-methyllysine	0.35117	0
pyrraline	0.348274	1
glutamine_degradant*	0.345002	0
alliin	0.344	1
trimethylamine N-oxide	0.339681	0
(S)-3-hydroxybutyrylcarnitine	0.335161	0
3-methylhistidine	0.330381	0
5-hydroxylysine	0.327789	0
formiminoglutamate	0.325272	0
hexanoylcarnitine (C6)	0.323692	0
4-guanidinobutanoate	0.323368	0
isobutyrylcarnitine (C4)	0.319325	0
N-carbamoylalanine	0.317925	0
adipoylcarnitine (C6-DC)	0.31377	0
homostachydrine*	0.308825	1
3-phosphoglycerate	0.307455	0
quinolinate	0.307409	0
N-acetylalliin	0.306667	1
cysteine-glutathione disulfide	0.302886	0
pimeloylcarnitine/3-methyladipoylcarnitine (C7-DC)	0.299071	0
picolinate	0.297745	0
3-ureidopropionate	0.294197	0
cysteinylglycine	0.294176	0
hypotaurine	0.290843	0
nicotinate ribonucleoside	0.288	0
phenylacetylglutamine	0.285907	0
argininate*	0.282011	0
butyrylcarnitine (C4)	0.281765	0
cotinine	0.279111	1
S-methylmethionine	0.27491	0
N-acetylproline	0.272597	0
glutamate	0.272542	0
cytosine	0.264928	0
5-(galactosylhydroxy)-lysine	0.264006	0
leucylglycine	0.263111	0
2-methylserine	0.262717	0
2-methylmalonylcarnitine (C4-DC)	0.260333	0
isovalerylcarnitine (C5)	0.256813	0
pro-hydroxy-pro	0.255616	0
1-ribosyl-imidazoleacetate*	0.254551	0
N-methylpipecolate	0.254534	0
nicotinamide	0.253043	0
methionine sulfoxide	0.252338	0
glutarylcarnitine (C5-DC)	0.24982	0
gamma-glutamylvaline	0.247166	0
methionine sulfone	0.246091	0
beta-alanine	0.240692	0
N-methylproline	0.2379	0
S-1-pyrroline-5-carboxylate	0.234523	0
2-aminoheptanoate	0.234031	0
N-acetylglutamate	0.233695	0
trans-4-hydroxyproline	0.232961	0
creatine	0.231808	0
serotonin	0.231111	0
N-acetyl-isoputreanine	0.230397	0
1-methyl-4-imidazoleacetate	0.229761	0
sarcosine	0.229629	0
tiglylcarnitine (C5:1-DC)	0.229142	0
glycerophosphorylcholine (GPC)	0.226736	0
2-methylbutyrylcarnitine (C5)	0.226539	0
N-methylalanine	0.223135	0
N6,N6,N6-trimethyllysine	0.222951	0
homoarginine	0.220718	0
gamma-glutamylcitrulline*	0.219846	0
N-acetylhistidine	0.219838	0
gamma-glutamyl-2-aminobutyrate	0.219718	0
2-hydroxyglutarate	0.219252	0
aspartate	0.217066	0
cys-gly, oxidized	0.215428	0
gamma-glutamylmethionine	0.212934	0
propionylcarnitine (C3)	0.211285	0
gamma-glutamylglutamate	0.209138	0
urea	0.208462	0
thioproline	0.207365	0
N-acetylglucosaminylasparagine	0.205836	0
malonylcarnitine	0.205503	0
imidazole lactate	0.205067	0
glutamate, gamma-methyl ester	0.204711	0
betonicine	0.204444	1
1-methylurate	0.203556	0
cysteine	0.20207	0
2'-O-methylcytidine	0.198843	0
N-alpha-acetylornithine	0.198768	0
gamma-glutamylglycine	0.198431	0
N6-carboxymethyllysine	0.197403	0
gamma-glutamylisoleucine*	0.19719	0
succinylcarnitine (C4-DC)	0.196724	0
trans-urocanate	0.195894	0
cytidine	0.194151	0
gamma-glutamylhistidine	0.192061	0
glycerol 3-phosphate	0.192012	0
(N(1) + N(8))-acetylspermidine	0.191813	0
gamma-glutamylleucine	0.190994	0
choline phosphate	0.189295	0
phosphoethanolamine	0.18637	0
3-methylcytidine	0.184803	0
valylleucine	0.182852	0
adenine	0.178632	0
gamma-glutamyltyrosine	0.178507	0
dimethylglycine	0.17826	0
hydroxyasparagine**	0.173592	0
gamma-glutamylphenylalanine	0.172522	0
N-acetylneuraminate	0.168418	0
cystine	0.167401	0
acetylcarnitine (C2)	0.166044	0
N-acetylputrescine	0.165077	0
phenylalanylalanine	0.16437	0
glycerophosphoethanolamine	0.161588	0
gamma-carboxyglutamate	0.159733	0
carboxyethyl-GABA	0.157399	0
kynurenine	0.154674	0
gamma-glutamyl-alpha-lysine	0.154615	0
glycine	0.153853	0
tyrosine	0.148217	0
gamma-glutamylthreonine	0.148038	0
gamma-glutamyl-epsilon-lysine	0.146262	0
leucine	0.146197	0
threonine	0.144889	0
isoleucine	0.144045	0
valine	0.142138	0
citrulline	0.141739	0
taurine	0.141608	0
methionine	0.137405	0
arginine	0.135665	0
gamma-glutamylglutamine	0.135652	0
3-amino-2-piperidone	0.133128	0
ornithine	0.132973	0
proline	0.13221	0
deoxycarnitine	0.13104	0
serine	0.130176	0
phenylalanylglycine	0.130007	0
tryptophan	0.118233	0
asparagine	0.115019	0
iminodiacetate (IDA)	0.114526	0
choline	0.113197	0
7-methylguanine	0.11237	0
lysine	0.111188	0
betaine	0.106669	0
cysteinylglycine disulfide*	0.100181	0
alanine	0.0996164	0
phosphate	0.0958373	0
dimethylarginine (SDMA + ADMA)	0.0949674	0
phenylalanine	0.0901383	0
creatinine	0.0838572	0
carnitine	0.0788386	0
glutamine	0.0654845	0

## Sheet: Methods
Notes
Data: Metabolomics Workbench ST002089, analysis AN003410 (Reversed phase POSITIVE ION MODE; relativeMedian units). REST: /rest/study/analysis_id/AN003410/datatable/json
Gini: concentration inequality across samples (0=equal, higher=more unequal).
pharmaceutical_drug=1 if the metabolite matches the British National Formulary (BNF) drug A–Z list at https://bnf.nice.org.uk/drugs/ (scraped once per run from /drugs/{slug}/ links). Match: normalized exact phrase from slug, or a BNF token (length>=6, not salt/solvent skip list, not a generic chemistry substring blocklist) appears in the metabolite name.
Requires live access to NICE; if the page layout changes, update the scraper.
Some were modified manually by the first author.
