# Supplementary material
Source: Research Square preprint supplement (doi:10.21203/rs.3.rs-10057852/v1)
Supplement: Supplementary file 2 [file cb8f7603ac0b00cd9d227ed8.xlsx]

## Sheet: MAF
database_identifier	chemical_formula	smiles	inchi	metabolite_identification	mass_to_charge	fragmentation	modifications	charge	retention_time	taxid	species	database	database_version	reliability	uri	search_engine	search_engine_score	smallmolecule_abundance_sub	smallmolecule_abundance_stdev_sub	smallmolecule_abundance_std_error_sub	Person01_plasma_youth_POS	Person02_plasma_youth_POS	Person03_plasma_youth_POS	Person04_plasma_youth_POS	Person05_plasma_elder_POS	Person06_plasma_elder_POS	Person07_plasma_elder_POS	Person08_plasma_elder_POS	Person09_plasma_elder_POS	Person10_plasma_elder_POS	Person11_plasma_youth_POS	Person12_plasma_youth_POS	Person13_plasma_youth_POS	Person14_plasma_youth_POS	Person15_plasma_youth_POS	Person16_plasma_youth_POS	Person17_plasma_youth_POS	Person18_plasma_elder_POS	Person19_plasma_elder_POS	Person20_plasma_youth_POS	Person21_plasma_youth_POS	Person22_plasma_elder_POS	Person23_plasma_elder_POS	Person24_plasma_elder_POS	Person25_plasma_elder_POS	Person26_plasma_elder_POS	Person27_plasma_youth_POS	Person28_plasma_youth_POS	Person29_plasma_elder_POS
CHEBI:16761	C10H15N5O10P2	Nc1ncnc2n(cnc12)[C@@H]1O[C@H](COP(O)(=O)OP(O)(O)=O)[C@@H](O)[C@H]1O	InChI=1S/C10H15N5O10P2/c11-8-5-9(13-2-12-8)15(3-14-5)10-7(17)6(16)4(24-10)1-23-27(21,22)25-26(18,19)20/h2-4,6-7,10,16-17H,1H2,(H,21,22)(H2,11,12,13)(H2,18,19,20)/t4-,6-,7-,10-/m1/s1	ADP	428.036		[M+H]+	positive	12.8	NCBITAXON:http://purl.bioontology.org/ontology/NCBITAXON/9606	Homo sapiens			5:very good reliability							2.96099e+06	1.61937e+06	3.48032e+06	1.62299e+06	8.89391e+06	10600000	8.27736e+06	4.65643e+06	1.33164e+06	3.617e+06	4.07483e+06	5.18692e+06	6.97905e+06	3.5402e+06	6.3315e+06	6.04304e+06	9.58277e+06	5.14975e+06	7.86247e+06	4.53245e+06	9.32468e+06	8.89372e+06	6.56704e+06	3.11314e+06	681109	4.22839e+06	7.107e+06	4.42281e+06	2.56552e+06
CHEBI:16027	C10H14N5O7P	Nc1ncnc2n(cnc12)[C@@H]1O[C@H](COP(O)(O)=O)[C@@H](O)[C@H]1O	InChI=1S/C10H14N5O7P/c11-8-5-9(13-2-12-8)15(3-14-5)10-7(17)6(16)4(22-10)1-21-23(18,19)20/h2-4,6-7,10,16-17H,1H2,(H2,11,12,13)(H2,18,19,20)/t4-,6-,7-,10-/m1/s1	AMP	348.07		[M+H]+	positive	11.6	NCBITAXON:http://purl.bioontology.org/ontology/NCBITAXON/9606	Homo sapiens			5:very good reliability							2.37768e+06	1.06549e+06	1.36752e+06	1.28534e+06	3.99708e+06	4.96133e+06	4.7954e+06	1.52553e+06	986892	2.35014e+06	1.5717e+06	3.28315e+06	2.35546e+06	2.06168e+06	2.73643e+06	2.19655e+06	4.93756e+06	2.47048e+06	6.99414e+06	3.88404e+06	5.60034e+06	3.49129e+06	2.01065e+06	2.29537e+06	520786	1.8068e+06	2.91513e+06	2.99455e+06	1.33531e+06
CHEBI:15422	C10H16N5O13P3	Nc1ncnc2n(cnc12)[C@@H]1O[C@H](COP(O)(=O)OP(O)(=O)OP(O)(O)=O)[C@@H](O)[C@H]1O	InChI=1S/C10H16N5O13P3/c11-8-5-9(13-2-12-8)15(3-14-5)10-7(17)6(16)4(26-10)1-25-30(21,22)28-31(23,24)27-29(18,19)20/h2-4,6-7,10,16-17H,1H2,(H,21,22)(H,23,24)(H2,11,12,13)(H2,18,19,20)/t4-,6-,7-,10-/m1/s1	ATP	508.002		[M+H]+	positive	13.9	NCBITAXON:http://purl.bioontology.org/ontology/NCBITAXON/9606	Homo sapiens			5:very good reliability							12300000	5.90602e+06	19200000	7.51213e+06	13100000	18900000	13700000	8.30626e+06	9.00225e+06	12100000	12400000	18700000	18500000	12700000	18300000	21800000	18900000	10600000	16600000	9.31662e+06	19100000	17900000	24200000	13400000	3.01826e+06	12900000	24100000	14700000	9.0043e+06
CHEBI:17677	C9H16N3O14P3	Nc1ccn([C@@H]2O[C@H](COP(O)(=O)OP(O)(=O)OP(O)(O)=O)[C@@H](O)[C@H]2O)c(=O)n1	InChI=1S/C9H16N3O14P3/c10-5-1-2-12(9(15)11-5)8-7(14)6(13)4(24-8)3-23-28(19,20)26-29(21,22)25-27(16,17)18/h1-2,4,6-8,13-14H,3H2,(H,19,20)(H,21,22)(H2,10,11,15)(H2,16,17,18)/t4-,6-,7-,8-/m1/s1	CTP	483.99		[M+H]+	positive	15.5	NCBITAXON:http://purl.bioontology.org/ontology/NCBITAXON/9606	Homo sapiens			5:very good reliability							225247	78189.1	413001	106656	262569	415492	140435	159181	191615	199706	185026	390001	407674	187126	378411	620571	460792	159065	306416	157128	340555	454636	407949	203783	31940	269935	545463	230895	125392
CHEBI:15996	C10H16N5O14P3	Nc1nc2n(cnc2c(=O)[nH]1)[C@@H]1O[C@H](COP(O)(=O)OP(O)(=O)OP(O)(O)=O)[C@@H](O)[C@H]1O	InChI=1S/C10H16N5O14P3/c11-10-13-7-4(8(18)14-10)12-2-15(7)9-6(17)5(16)3(27-9)1-26-31(22,23)29-32(24,25)28-30(19,20)21/h2-3,5-6,9,16-17H,1H2,(H,22,23)(H,24,25)(H2,19,20,21)(H3,11,13,14,18)/t3-,5-,6-,9-/m1/s1	GTP	523.996		[M+H]+	positive	16.4	NCBITAXON:http://purl.bioontology.org/ontology/NCBITAXON/9606	Homo sapiens			5:very good reliability							597521	211888	1.50002e+06	285459	1.0502e+06	1.02041e+06	444748	499213	431465	594254	623036	1.05814e+06	1.04638e+06	651416	916309	1.48827e+06	1.02978e+06	628478	968382	396700	1.41042e+06	1.26053e+06	1.40817e+06	741242	93651.8	626916	1.70901e+06	833033	399623
CHEBI:17202	C10H13N4O8P	O[C@@H]1[C@@H](COP(O)(O)=O)O[C@H]([C@@H]1O)n1cnc2c1nc[nH]c2=O	InChI=1S/C10H13N4O8P/c15-6-4(1-21-23(18,19)20)22-10(7(6)16)14-3-13-5-8(14)11-2-12-9(5)17/h2-4,6-7,10,15-16H,1H2,(H,11,12,17)(H2,18,19,20)/t4-,6-,7-,10-/m1/s1	IMP	349.054		[M+H]+	positive	13.2	NCBITAXON:http://purl.bioontology.org/ontology/NCBITAXON/9606	Homo sapiens			5:very good reliability							31602.6	0	39281.8	0	71867.8	56953.3	56948.2	30474.3	40751	42541	20219.4	55961.1	47026.3	42139.6	24044.2	63321.3	96343.9	33647.2	53869.4	27040.5	137286	65496.3	70457.2	67024.3	4051.79	40444.5	127489	62523.1	18993.9
CHEBI:17659	C9H14N2O12P2	O[C@@H]1[C@@H](COP(O)(=O)OP(O)(O)=O)O[C@H]([C@@H]1O)n1ccc(=O)[nH]c1=O	InChI=1S/C9H14N2O12P2/c12-5-1-2-11(9(15)10-5)8-7(14)6(13)4(22-8)3-21-25(19,20)23-24(16,17)18/h1-2,4,6-8,13-14H,3H2,(H,19,20)(H,10,12,15)(H2,16,17,18)/t4-,6-,7-,8-/m1/s1	UDP	405.008		[M+H]+	positive	13.9	NCBITAXON:http://purl.bioontology.org/ontology/NCBITAXON/9606	Homo sapiens			5:very good reliability							61350.9	18123.4	105434	22965.8	67917.5	74564.7	38635.7	22323.4	44659.3	69746.4	56703.7	106256	57360.8	36103.5	68671.5	63446.6	172185	74695.6	120742	63972	111911	134089	99637.5	64957.2	0	56224.4	121168	63678	34178.8
CHEBI:16020	C11H15N5O4	Cn1cnc2n(cnc2c1=N)[C@@H]1O[C@H](CO)[C@@H](O)[C@H]1O	InChI=1S/C11H15N5O4/c1-15-3-14-10-6(9(15)12)13-4-16(10)11-8(19)7(18)5(2-17)20-11/h3-5,7-8,11-12,17-19H,2H2,1H3/t5-,7-,8-,11-/m1/s1	1-Methyl-adenosine	282.118		[M+H]+	positive	11.3	NCBITAXON:http://purl.bioontology.org/ontology/NCBITAXON/9606	Homo sapiens			5:very good reliability							7.80008e+06	6.61196e+06	6.96458e+06	10100000	12100000	14000000	13800000	5.76939e+06	2.93502e+06	3.63107e+06	8.82027e+06	7.99405e+06	6.0622e+06	8.89411e+06	11300000	7.80203e+06	7.56838e+06	6.2242e+06	11600000	4.03118e+06	6.61777e+06	8.15407e+06	9.9264e+06	12000000	8.6674e+06	11100000	12400000	13400000	8.86165e+06
CHEBI:19062	C11H15N5O5	Cn1c(N)nc2n(cnc2c1=O)[C@@H]1O[C@H](CO)[C@@H](O)[C@H]1O	InChI=1S/C11H15N5O5/c1-15-9(20)5-8(14-11(15)12)16(3-13-5)10-7(19)6(18)4(2-17)21-10/h3-4,6-7,10,17-19H,2H2,1H3,(H2,12,14)/t4-,6-,7-,10-/m1/s1	1-Methyl-guanosine	298.114		[M+H]+	positive	7.2	NCBITAXON:http://purl.bioontology.org/ontology/NCBITAXON/9606	Homo sapiens			5:very good reliability							950336	1.01493e+06	1.29142e+06	723577	909525	1.37102e+06	738472	842292	1.23266e+06	887487	909899	1.19551e+06	747910	1.34237e+06	1.0108e+06	758048	625605	708869	1.0139e+06	947408	916764	1.06481e+06	1.19641e+06	836509	1.17588e+06	752713	877718	1.03175e+06	907484
CHEBI:16708	C5H5N5	Nc1ncnc2[nH]cnc12	InChI=1S/C5H5N5/c6-4-3-5(9-1-7-3)10-2-8-4/h1-2H,(H3,6,7,8,9,10)	Adenine	136.061		[M+H]+	positive	6.7	NCBITAXON:http://purl.bioontology.org/ontology/NCBITAXON/9606	Homo sapiens			5:very good reliability							1.05804e+06	3.62384e+06	3.49698e+06	2.08782e+06	1.91253e+06	4.28756e+06	2.93976e+06	4.07649e+06	1.66576e+06	1.94363e+06	3.00869e+06	3.54392e+06	1.82475e+06	5.17107e+06	3.46739e+06	2.79782e+06	2.24788e+06	4.02423e+06	2.55955e+06	3.81492e+06	1.33723e+06	987556	2.52132e+06	2.74795e+06	2.72982e+06	3.08654e+06	2.55154e+06	2.69696e+06	1.5714e+06
CHEBI:16335	C10H13N5O4	Nc1ncnc2n(cnc12)[C@@H]1O[C@H](CO)[C@@H](O)[C@H]1O	InChI=1S/C10H13N5O4/c11-8-5-9(13-2-12-8)15(3-14-5)10-7(18)6(17)4(1-16)19-10/h2-4,6-7,10,16-18H,1H2,(H2,11,12,13)/t4-,6-,7-,10-/m1/s1	Adenosine	268.103		[M+H]+	positive	6.3	NCBITAXON:http://purl.bioontology.org/ontology/NCBITAXON/9606	Homo sapiens			5:very good reliability							17200000	21100000	14400000	10200000	29000000	32200000	43500000	16500000	6.65241e+06	10600000	24900000	34700000	23300000	21000000	25000000	22200000	22200000	27700000	26900000	12700000	13200000	12700000	28900000	36200000	58700000	12500000	22300000	12800000	10800000
CHEBI:27732	C8H10N4O2	Cn1cnc2n(C)c(=O)n(C)c(=O)c12	InChI=1S/C8H10N4O2/c1-10-4-9-6-5(10)7(13)12(3)8(14)11(6)2/h4H,1-3H3	Caffeine	195.087		[M+H]+	positive	3.8	NCBITAXON:http://purl.bioontology.org/ontology/NCBITAXON/9606	Homo sapiens			5:very good reliability							30800000	121000000	184000000	104000000	227000000	419000000	44000000	24100000	70300000	294000000	440000000	111000000	201000000	173000000	93400000	75600000	22200000	18700000	46000000	96200000	679413	461000000	145000000	125000000	20100000	325000000	181000000	45000000	30400000
CHEBI:17562	C9H13N3O5	Nc1ccn([C@@H]2O[C@H](CO)[C@@H](O)[C@H]2O)c(=O)n1	InChI=1S/C9H13N3O5/c10-5-1-2-12(9(16)11-5)8-7(15)6(14)4(3-13)17-8/h1-2,4,6-8,13-15H,3H2,(H2,10,11,16)/t4-,6-,7-,8-/m1/s1	Cytidine	244.092		[M+H]+	positive	9.1	NCBITAXON:http://purl.bioontology.org/ontology/NCBITAXON/9606	Homo sapiens			5:very good reliability							2.71795e+06	2.06958e+06	1.83231e+06	1.66023e+06	2.73988e+06	3.66636e+06	5.69757e+06	2.98275e+06	2.63491e+06	1.42479e+06	2.79948e+06	1.84174e+06	2.64596e+06	3.21661e+06	3.21588e+06	4.06729e+06	2.17314e+06	1.56116e+06	4.10179e+06	2.64168e+06	3.00065e+06	4.70006e+06	2.24229e+06	3.01537e+06	3.27874e+06	2.04112e+06	3.09079e+06	1.56797e+06	2.41251e+06
CHEBI:19289	C12H17N5O5	CN(C)c1nc2n(cnc2c(=O)[nH]1)[C@@H]1O[C@H](CO)[C@@H](O)[C@H]1O	InChI=1S/C12H17N5O5/c1-16(2)12-14-9-6(10(21)15-12)13-4-17(9)11-8(20)7(19)5(3-18)22-11/h4-5,7-8,11,18-20H,3H2,1-2H3,(H,14,15,21)/t5-,7-,8-,11-/m1/s1	Dimethyl-guanosine	312.13		[M+H]+	positive	6	NCBITAXON:http://purl.bioontology.org/ontology/NCBITAXON/9606	Homo sapiens			5:very good reliability							1.82264e+06	1.41063e+06	2.81723e+06	1.38813e+06	2.22174e+06	4.49489e+06	1.71174e+06	3.23574e+06	3.68329e+06	3.29378e+06	2.61363e+06	2.8432e+06	1.96348e+06	2.31057e+06	2.67991e+06	2.2212e+06	1.81823e+06	1.66781e+06	2.25326e+06	1.51198e+06	2.05107e+06	3.65199e+06	3.25276e+06	3.29329e+06	2.7142e+06	1.62668e+06	1.6367e+06	1.84348e+06	2.09958e+06
CHEBI:23818	C7H8N4O2			Dimethyl-xanthine	181.071		[M+H]+	positive	4.5	NCBITAXON:http://purl.bioontology.org/ontology/NCBITAXON/9606	Homo sapiens			5:very good reliability							69300000	127000000	117000000	86500000	115000000	163000000	41500000	8.85452e+06	41500000	56100000	220000000	81600000	276000000	144000000	134000000	52800000	61900000	28200000	60000000	85500000	3.62157e+06	103000000	64800000	103000000	5.17445e+06	119000000	150000000	91400000	29300000
CHEBI:30753	C7H7NO2	Nc1ccc(cc1)C(O)=O	InChI=1S/C7H7NO2/c8-6-3-1-5(2-4-6)7(9)10/h1-4H,8H2,(H,9,10)	4-Aminobenzoate	138.054		[M+H]+	positive	7.3	NCBITAXON:http://purl.bioontology.org/ontology/NCBITAXON/9606	Homo sapiens			5:very good reliability							50876.8	501982	416308	16400000	747222	35600000	960490	16622.6	1.66548e+06	1.41615e+06	67300000	1.87005e+06	0	266184	188548	20680.9	127170	535162	299559	0	4458.18	4.37235e+06	1.29348e+06	339124	386278	21500000	117495	229039	52400000
CHEBI:15846	C21H28N7O14P2+	NC(=O)c1ccc[n+](c1)[C@@H]1O[C@H](COP(O)(=O)OP(O)(=O)OC[C@H]2O[C@H]([C@H](O)[C@@H]2O)n2cnc3c(N)ncnc23)[C@@H](O)[C@H]1O	InChI=1S/C21H27N7O14P2/c22-17-12-19(25-7-24-17)28(8-26-12)21-16(32)14(30)11(41-21)6-39-44(36,37)42-43(34,35)38-5-10-13(29)15(31)20(40-10)27-3-1-2-9(4-27)18(23)33/h1-4,7-8,10-11,13-16,20-21,29-32H,5-6H2,(H5-,22,23,24,25,33,34,35,36,37)/p+1/t10-,11-,13-,14-,15-,16-,20-,21-/m1/s1	NAD+	664.114		[M+H]+	positive	12	NCBITAXON:http://purl.bioontology.org/ontology/NCBITAXON/9606	Homo sapiens			5:very good reliability							2.11902e+06	1.33016e+06	1.63257e+06	1.51197e+06	1.20287e+06	1.60003e+06	912295	593662	977803	1.98625e+06	1.82602e+06	3.24122e+06	1.68745e+06	734270	1.42711e+06	1.66932e+06	2.41848e+06	1.06732e+06	2.00318e+06	1.72611e+06	1.62456e+06	2.25108e+06	1.88104e+06	1.16926e+06	179007	1.57471e+06	3.13323e+06	1.96658e+06	901898
CHEBI:18009	C21H29N7O17P3+	NC(=O)c1ccc[n+](c1)[C@@H]1O[C@H](COP(O)(=O)OP(O)(=O)OC[C@H]2O[C@H]([C@H](OP(O)(O)=O)[C@@H]2O)n2cnc3c(N)ncnc23)[C@@H](O)[C@H]1O	InChI=1S/C21H28N7O17P3/c22-17-12-19(25-7-24-17)28(8-26-12)21-16(44-46(33,34)35)14(30)11(43-21)6-41-48(38,39)45-47(36,37)40-5-10-13(29)15(31)20(42-10)27-3-1-2-9(4-27)18(23)32/h1-4,7-8,10-11,13-16,20-21,29-31H,5-6H2,(H7-,22,23,24,25,32,33,34,35,36,37,38,39)/p+1/t10-,11-,13-,14-,15-,16-,20-,21-/m1/s1	NADP+	744.081		[M+H]+	positive	14.5	NCBITAXON:http://purl.bioontology.org/ontology/NCBITAXON/9606	Homo sapiens			5:very good reliability
CHEBI:17154	C6H6N2O	NC(=O)c1cccnc1	InChI=1S/C6H6N2O/c7-6(9)5-2-1-3-8-4-5/h1-4H,(H2,7,9)	Nicotinamide	123.055		[M+H]+	positive	4.8	NCBITAXON:http://purl.bioontology.org/ontology/NCBITAXON/9606	Homo sapiens			5:very good reliability							46908.3	397915	985994	169580	1.52655e+06	1.35417e+06	2.07036e+06	935758	190077	237178	1.05915e+06	2.30131e+06	1.44153e+06	2.0229e+06	1.13354e+06	22825.6	466715	335970	1.03039e+06	898623	1.55062e+06	748529	684019	548801	175696	1.07515e+06	1.68202e+06	1.23298e+06	233064
CHEBI:7916	C9H17NO5	CC(C)(CO)C(O)C(=O)NCCC(O)=O	InChI=1S/C9H17NO5/c1-9(2,5-11)7(14)8(15)10-4-3-6(12)13/h7,11,14H,3-5H2,1-2H3,(H,10,15)(H,12,13)	Pantothenate	220.117		[M+H]+	positive	5.9	NCBITAXON:http://purl.bioontology.org/ontology/NCBITAXON/9606	Homo sapiens			5:very good reliability							6.18938e+06	4.6864e+06	12100000	7.54534e+06	7.54074e+06	14200000	10200000	5.06214e+06	3.82191e+06	38500000	9.8251e+06	6.7299e+06	6.55128e+06	7.53749e+06	9.23656e+06	13100000	8.96695e+06	22700000	10100000	9.35946e+06	14800000	21700000	14200000	18900000	17300000	7.99756e+06	8.52152e+06	8.15621e+06	62400000
CHEBI:29062	C16H25N5O16P2			GDP-glucose	606.083		[M+H]+	positive	15.5	NCBITAXON:http://purl.bioontology.org/ontology/NCBITAXON/9606	Homo sapiens			5:very good reliability							333912	170736	624723	192520	565691	651662	217246	201397	264783	353791	357626	679746	804385	574622	945612	748802	658167	212920	411462	391588	546603	761205	1.17314e+06	327546	59097.8	609464	1.16856e+06	813734	330770
CHEBI:5417	C6H13NO5			Glucosamine	180.086		[M+H]+	positive	11.6	NCBITAXON:http://purl.bioontology.org/ontology/NCBITAXON/9606	Homo sapiens			5:very good reliability							17800000	14200000	45200000	14900000	55500000	50400000	34000000	61000000	14800000	18100000	19400000	28800000	57800000	36900000	24500000	32300000	46200000	38500000	24500000	16900000	20800000	51600000	58100000	40600000	38200000	49600000	46000000	65400000	18200000
CHEBI:506227	C8H15NO6	CC(=O)N[C@H]1C(O)O[C@H](CO)[C@@H](O)[C@@H]1O	InChI=1S/C8H15NO6/c1-3(11)9-5-7(13)6(12)4(2-10)15-8(5)14/h4-8,10,12-14H,2H2,1H3,(H,9,11)/t4-,5-,6-,7-,8?/m1/s1	N-Acetyl-D-glucosamine	222.097		[M+H]+	positive	9.6	NCBITAXON:http://purl.bioontology.org/ontology/NCBITAXON/9606	Homo sapiens			5:very good reliability							5.46568e+06	6.50093e+06	9.65784e+06	4.61455e+06	3.23477e+06	4.08731e+06	2.84615e+06	2.86959e+06	8.17506e+06	7.60369e+06	8.93815e+06	9.07076e+06	2.30438e+06	1.59011e+06	3.27206e+06	1.47994e+06	7.83593e+06	9.9986e+06	7.22127e+06	5.84424e+06	6.76774e+06	13000000	10100000	13100000	3.07318e+06	2.31953e+06	1.7664e+06	2.95112e+06	2.38463e+06
CHEBI:29016	C6H14N4O2	NC(CCCNC(N)=N)C(O)=O	InChI=1S/C6H14N4O2/c7-4(5(11)12)2-1-3-10-6(8)9/h4H,1-3,7H2,(H,11,12)(H4,8,9,10)	Arginine	175.118		[M+H]+	positive	22.4	NCBITAXON:http://purl.bioontology.org/ontology/NCBITAXON/9606	Homo sapiens			5:very good reliability							234000000	177000000	225000000	210000000	250000000	425000000	310000000	265000000	189000000	234000000	340000000	274000000	291000000	311000000	341000000	277000000	180000000	167000000	156000000	98100000	153000000	251000000	285000000	209000000	212000000	294000000	220000000	255000000	247000000
CHEBI:27570	C6H9N3O2	NC(Cc1c[nH]cn1)C(O)=O	InChI=1S/C6H9N3O2/c7-5(6(10)11)1-4-2-8-3-9-4/h2-3,5H,1,7H2,(H,8,9)(H,10,11)	Histidine	156.076		[M+H]+	positive	11.8	NCBITAXON:http://purl.bioontology.org/ontology/NCBITAXON/9606	Homo sapiens			5:very good reliability							76000000	79400000	98500000	63300000	57000000	49200000	76400000	47100000	40100000	51900000	71000000	62200000	51200000	63200000	69700000	59000000	49100000	56500000	46800000	69100000	54400000	50400000	53600000	60400000	49100000	43600000	54700000	75600000	59100000
CHEBI:28044	C9H11NO2	NC(Cc1ccccc1)C(O)=O	InChI=1S/C9H11NO2/c10-8(9(11)12)6-7-4-2-1-3-5-7/h1-5,8H,6,10H2,(H,11,12)	Phenylalanine	166.086		[M+H]+	positive	7.2	NCBITAXON:http://purl.bioontology.org/ontology/NCBITAXON/9606	Homo sapiens			5:very good reliability							284000000	223000000	475000000	275000000	404000000	356000000	387000000	398000000	273000000	387000000	381000000	353000000	305000000	319000000	322000000	327000000	248000000	334000000	272000000	300000000	282000000	308000000	419000000	314000000	275000000	374000000	345000000	311000000	373000000
CHEBI:27897	C11H12N2O2	NC(Cc1c[nH]c2ccccc12)C(O)=O	InChI=1S/C11H12N2O2/c12-9(11(14)15)5-7-6-13-10-4-2-1-3-8(7)10/h1-4,6,9,13H,5,12H2,(H,14,15)	Tryptophan	205.097		[M+H]+	positive	8.7	NCBITAXON:http://purl.bioontology.org/ontology/NCBITAXON/9606	Homo sapiens			5:very good reliability							182000000	181000000	139000000	186000000	166000000	148000000	240000000	132000000	67400000	148000000	243000000	186000000	190000000	230000000	214000000	168000000	145000000	126000000	108000000	129000000	126000000	139000000	208000000	104000000	109000000	178000000	204000000	186000000	179000000
CHEBI:18186	C9H11NO3	NC(Cc1ccc(O)cc1)C(O)=O	InChI=1S/C9H11NO3/c10-8(9(12)13)5-6-1-3-7(11)4-2-6/h1-4,8,11H,5,10H2,(H,12,13)	Tyrosine	182.081		[M+H]+	positive	10.3	NCBITAXON:http://purl.bioontology.org/ontology/NCBITAXON/9606	Homo sapiens			5:very good reliability							63000000	37000000	80200000	46900000	102000000	112000000	102000000	105000000	72700000	81600000	85500000	79000000	78100000	85400000	84000000	83100000	62700000	90600000	49500000	54900000	60200000	94100000	107000000	62700000	65300000	85100000	93600000	88700000	103000000
CHEBI:17750	C5H11NO2	C[N+](C)(C)CC([O-])=O	InChI=1S/C5H11NO2/c1-6(2,3)4-5(7)8/h4H2,1-3H3	Betaine	118.086		[M+H]+	positive	8.6	NCBITAXON:http://purl.bioontology.org/ontology/NCBITAXON/9606	Homo sapiens			5:very good reliability							7.04438e+06	9.96985e+06	20100000	24800000	23800000	29600000	28400000	21000000	24100000	27000000	18600000	17400000	19500000	11900000	25600000	10148.5	20400000	14000000	26700000	6.27846e+06	5.56747e+06	8.655e+06	15900000	10200000	5.01518e+06	18500000	15700000	12500000	16600000
CHEBI:1941	C7H16NO2+	C[N+](C)(C)CCCC(O)=O	InChI=1S/C7H15NO2/c1-8(2,3)6-4-5-7(9)10/h4-6H2,1-3H3/p+1	Butyro-betaine	146.117		[M+H]+	positive	11	NCBITAXON:http://purl.bioontology.org/ontology/NCBITAXON/9606	Homo sapiens			5:very good reliability							3.20817e+06	4.17409e+06	6.50798e+06	2.79622e+06	2.36568e+06	3.46437e+06	3.05178e+06	3.93071e+06	4.23855e+06	3.75068e+06	3.29236e+06	2.56296e+06	4.85295e+06	3.16538e+06	2.4303e+06	2.03567e+06	2.02426e+06	2.05148e+06	6.70951e+06	2.56052e+06	3.33535e+06	1.26377e+06	1.88103e+06	2.34068e+06	2.03699e+06	1.61143e+06	2.79425e+06	2.48118e+06	2.4279e+06
CHEBI:17929	C8H18N4O2	CN(C)C(=N)NCCC[C@H](N)C(O)=O	InChI=1S/C8H18N4O2/c1-12(2)8(10)11-5-3-4-6(9)7(13)14/h6H,3-5,9H2,1-2H3,(H2,10,11)(H,13,14)/t6-/m0/s1	Dimethyl-arginine	203.15		[M+H]+	positive	18.4	NCBITAXON:http://purl.bioontology.org/ontology/NCBITAXON/9606	Homo sapiens			5:very good reliability							42100000	23900000	67500000	26800000	41100000	84400000	39300000	67200000	76500000	52200000	55300000	47200000	45800000	46700000	55100000	43200000	39700000	33800000	32300000	28000000	46800000	47500000	43100000	33100000	48900000	39700000	38900000	44000000	53100000
CHEBI:43997	C8H18N2O2	CN(C)CCCC[C@H](N)C(O)=O	InChI=1S/C8H18N2O2/c1-10(2)6-4-3-5-7(9)8(11)12/h7H,3-6,9H2,1-2H3,(H,11,12)/t7-/m0/s1	Dimethyl-lysine	175.144		[M+H]+	positive	17.6	NCBITAXON:http://purl.bioontology.org/ontology/NCBITAXON/9606	Homo sapiens			5:very good reliability							9.48464e+06	3.69158e+06	22300000	6.34939e+06	6.04943e+06	18100000	6.19178e+06	23200000	14100000	20800000	15600000	9.61125e+06	10800000	7.80136e+06	22800000	7.77557e+06	5.76593e+06	9.797e+06	10200000	3.88887e+06	6.79504e+06	7.8103e+06	7.41267e+06	15300000	14900000	6.42578e+06	6.66226e+06	7.35682e+06	8.58252e+06
CHEBI:35280	C7H13NO2	C[N+]1(C)CCC[C@H]1C([O-])=O	InChI=1S/C7H13NO2/c1-8(2)5-3-4-6(8)7(9)10/h6H,3-5H2,1-2H3/t6-/m0/s1	Dimethyl-proline (stachydrine)	144.101		[M+H]+	positive	8	NCBITAXON:http://purl.bioontology.org/ontology/NCBITAXON/9606	Homo sapiens			5:very good reliability							14600000	46800000	262000000	122000000	23200000	52800000	19000000	197000000	207000000	170000000	58300000	48600000	555000000	46000000	25600000	60000000	350000000	15800000	17300000	21700000	101000000	94300000	334000000	215000000	12000000	122000000	360000000	110000000	57800000
CHEBI:70960	C7H11N3O2	CC(N)(Cc1cnc[nH]1)C(O)=O	InChI=1S/C7H11N3O2/c1-7(8,6(11)12)2-5-3-9-4-10-5/h3-4H,2,8H2,1H3,(H,9,10)(H,11,12)	alpha-methylhistidine	170.092		[M+H]+	positive	9.8	NCBITAXON:http://purl.bioontology.org/ontology/NCBITAXON/9606	Homo sapiens			5:very good reliability							39400000	40800000	59600000	37300000	33100000	64900000	28600000	41500000	55300000	52300000	49700000	45100000	33500000	36900000	39600000	36200000	28000000	35300000	28500000	29600000	32200000	41000000	34400000	32000000	38600000	22900000	27200000	37000000	46100000
CHEBI:70958	C7H11N3O2	Cn1cnc(CC(N)C(O)=O)c1	InChI=1S/C7H11N3O2/c1-10-3-5(9-4-10)2-6(8)7(11)12/h3-4,6H,2,8H2,1H3,(H,11,12)	1-methylhistidine	170.092		[M+H]+	positive	9.8	NCBITAXON:http://purl.bioontology.org/ontology/NCBITAXON/9606	Homo sapiens			5:very good reliability							39400000	40800000	59600000	37300000	33100000	64900000	28600000	41500000	55300000	52300000	49700000	45100000	33500000	36900000	39600000	36200000	28000000	35300000	28500000	29600000	32200000	41000000	34400000	32000000	38600000	22900000	27200000	37000000	46100000
CHEBI:70959	C7H11N3O2	Cn1cncc1CC(N)C(O)=O	InChI=1S/C7H11N3O2/c1-10-4-9-3-5(10)2-6(8)7(11)12/h3-4,6H,2,8H2,1H3,(H,11,12)	3-methylhistidine	170.092		[M+H]+	positive	9.8	NCBITAXON:http://purl.bioontology.org/ontology/NCBITAXON/9606	Homo sapiens			5:very good reliability							39400000	40800000	59600000	37300000	33100000	64900000	28600000	41500000	55300000	52300000	49700000	45100000	33500000	36900000	39600000	36200000	28000000	35300000	28500000	29600000	32200000	41000000	34400000	32000000	38600000	22900000	27200000	37000000	46100000
CHEBI:50601	C7H11N3O2	CN[C@@H](Cc1c[nH]cn1)C(O)=O	InChI=1S/C7H11N3O2/c1-8-6(7(11)12)2-5-3-9-4-10-5/h3-4,6,8H,2H2,1H3,(H,9,10)(H,11,12)/t6-/m0/s1	N(alpha)-methyl-L-histidine	170.092		[M+H]+	positive	9.8	NCBITAXON:http://purl.bioontology.org/ontology/NCBITAXON/9606	Homo sapiens			5:very good reliability							39400000	40800000	59600000	37300000	33100000	64900000	28600000	41500000	55300000	52300000	49700000	45100000	33500000	36900000	39600000	36200000	28000000	35300000	28500000	29600000	32200000	41000000	34400000	32000000	38600000	22900000	27200000	37000000	46100000
CHEBI:70961	C7H11N3O2	COC(=O)C(N)Cc1cnc[nH]1	InChI=1S/C7H11N3O2/c1-12-7(11)6(8)2-5-3-9-4-10-5/h3-4,6H,2,8H2,1H3,(H,9,10)	histidine methyl ester	170.092		[M+H]+	positive	9.8	NCBITAXON:http://purl.bioontology.org/ontology/NCBITAXON/9606	Homo sapiens			5:very good reliability							39400000	40800000	59600000	37300000	33100000	64900000	28600000	41500000	55300000	52300000	49700000	45100000	33500000	36900000	39600000	36200000	28000000	35300000	28500000	29600000	32200000	41000000	34400000	32000000	38600000	22900000	27200000	37000000	46100000
CHEBI:64349	C7H16N2O2	CNCCCCC(N)C(O)=O	InChI=1S/C7H16N2O2/c1-9-5-3-2-4-6(8)7(10)11/h6,9H,2-5,8H2,1H3,(H,10,11)	Methyl-lysine	161.128		[M+H]+	positive	20.4	NCBITAXON:http://purl.bioontology.org/ontology/NCBITAXON/9606	Homo sapiens			5:very good reliability							22400000	8.7977e+06	94900000	9.14248e+06	6.35999e+06	10900000	9.81399e+06	45000000	12400000	24200000	26900000	20000000	18600000	14100000	63000000	12300000	7.39995e+06	23700000	21600000	7.65112e+06	11100000	7.43326e+06	11200000	16900000	29800000	9.10231e+06	12500000	12300000	10700000
CHEBI:76620	C10H17N3O2S	[N+](C)([C@H](C(=O)[O-])CC=1NC(SC)=NC1)(C)C	InChI=1S/C10H17N3O2S/c1-13(2,3)8(9(14)15)5-7-6-11-10(12-7)16-4/h6,8H,5H2,1-4H3,(H-,11,12,14,15)/t8-/m0/s1	S-Methyl-ergothioneine	244.111		[M+H]+	positive	7.9	NCBITAXON:http://purl.bioontology.org/ontology/NCBITAXON/9606	Homo sapiens			5:very good reliability							298567	434917	535835	1.4998e+06	577556	472194	674185	613428	336050	443500	437437	103393	135777	616882	430295	521699	705028	287981	1.39674e+06	502973	346266	741136	1.09637e+06	705576	1.57435e+06	140319	213893	280617	381975
CHEBI:15781	C9H15N3O2	C[N+](C)(C)[C@@H](Cc1c[nH]cn1)C([O-])=O	InChI=1S/C9H15N3O2/c1-12(2,3)8(9(13)14)4-7-5-10-6-11-7/h5-6,8H,4H2,1-3H3,(H-,10,11,13,14)/t8-/m0/s1	Trimethyl-histidine (hercynine)	198.123		[M+H]+	positive	9.8	NCBITAXON:http://purl.bioontology.org/ontology/NCBITAXON/9606	Homo sapiens			3:medium reliability							6077.02	113004	23561.9	204299	70317.3	134968	130010	42802.3	16613.9	104884	31365.9	46706.5	523076	49048.3	34249.1	96245.8	254362	39864.2	112296	81560.6	49698.7	66729.2	29597.7	50728.6	249426	61672.7	65593.5	49533.1	77494.2
CHEBI:17311	C9H21N2O2+	C[N+](C)(C)CCCC[C@H](N)C(O)=O	InChI=1S/C9H20N2O2/c1-11(2,3)7-5-4-6-8(10)9(12)13/h8H,4-7,10H2,1-3H3/p+1/t8-/m0/s1	Trimethyl-lysine	189.159		[M+H]+	positive	19.3	NCBITAXON:http://purl.bioontology.org/ontology/NCBITAXON/9606	Homo sapiens			5:very good reliability							17800000	11900000	19100000	25900000	12800000	40700000	11900000	20100000	25400000	22900000	38200000	20900000	26700000	20400000	24600000	14800000	17000000	10800000	11400000	9.71053e+06	15800000	26900000	15100000	15700000	10600000	12100000	10600000	17800000	27900000
CHEBI:90135	C12H17NO2	O=C(O)C(N)CC1=C(C=C(C=C1C)C)C	InChI=1S/C12H17NO2/c1-7-4-8(2)10(9(3)5-7)6-11(13)12(14)15/h4-5,11H,6,13H2,1-3H3,(H,14,15)	Trimethyl-phenylalanine	208.133		[M+H]+	positive	5.5	NCBITAXON:http://purl.bioontology.org/ontology/NCBITAXON/9606	Homo sapiens			3:medium reliability							24243.1	52542.6	233331	224885	95542.6	94571.5	104989	266294	325511	67744.7	160075	55595	71328.1	88486.3	365774	648002	75161.3	40879.8	155415	72235.8	58942.5	758579	61617.7	49604.4	33887.1	54261	603679	296106	196815
CHEBI:5832	C14H18N2O2	C1(=CNC2=C1C=CC=C2)C[C@@H](C(=O)[O-])[N+](C)(C)C	InChI=1S/C14H18N2O2/c1-16(2,3)13(14(17)18)8-10-9-15-12-7-5-4-6-11(10)12/h4-7,9,13,15H,8H2,1-3H3/t13-/m0/s1	Trimethyl-tryptophan (hypaphorine)	247.143		[M+H]+	positive	6	NCBITAXON:http://purl.bioontology.org/ontology/NCBITAXON/9606	Homo sapiens			5:very good reliability							18800000	671547	19200000	4.05296e+06	9.11255e+06	344964	14900000	630843	1.32845e+06	246833	3.42747e+06	1.70381e+06	5.57317e+06	3.94028e+06	44400000	13000000	65000000	1.18296e+06	69400000	27600000	201000000	14500000	42500000	998387	370103	6.70487e+06	6.20219e+06	17400000	159000000
CHEBI:90142	C12H17NO3	O(C1=C(C(=C(CC(N)C(O)=O)C=C1)C)C)C	InChI=1S/C12H17NO3/c1-7-8(2)11(16-3)5-4-9(7)6-10(13)12(14)15/h4-5,10H,6,13H2,1-3H3,(H,14,15)	Trimethyl-tyrosine	224.128		[M+H]+	positive	7.5	NCBITAXON:http://purl.bioontology.org/ontology/NCBITAXON/9606	Homo sapiens			3:medium reliability							0	1.05588e+06	13969.2	86744.6	65844.5	0	69634	0	0	0	3670.7	18687.3	16173.3	0	0	5754.71	175568	11041	0	6.99243e+06	7.7389e+06	10600000	0	0	0	0	0	160579	0
CHEBI:84056	C8H15NO3	CCC(C)C(NC(C)=O)C(O)=O	InChI=1S/C8H15NO3/c1-4-5(2)7(8(11)12)9-6(3)10/h5,7H,4H2,1-3H3,(H,9,10)(H,11,12)	N-Acetylisoleucine	174.112		[M+H]+	positive	4	NCBITAXON:http://purl.bioontology.org/ontology/NCBITAXON/9606	Homo sapiens			5:very good reliability							284806	308197	434674	343867	1.5992e+06	1.77215e+06	435182	943597	694809	351310	643559	480154	332875	508732	1.1332e+06	541961	349048	428796	400824	297582	464878	1.60941e+06	894221	875799	733745	515526	886135	921726	508423
CHEBI:17786	C8H15NO3	[C@@H](CC(C)C)(NC(=O)C)C(O)=O	InChI=1S/C8H15NO3/c1-5(2)4-7(8(11)12)9-6(3)10/h5,7H,4H2,1-3H3,(H,9,10)(H,11,12)/t7-/m0/s1	N-Acetylleucine	174.112		[M+H]+	positive	4	NCBITAXON:http://purl.bioontology.org/ontology/NCBITAXON/9606	Homo sapiens			5:very good reliability							284806	308197	434674	343867	1.5992e+06	1.77215e+06	435182	943597	694809	351310	643559	480154	332875	508732	1.1332e+06	541961	349048	428796	400824	297582	464878	1.60941e+06	894221	875799	733745	515526	886135	921726	508423
CHEBI:40521	C8H16N4O3	CC(=O)N[C@@H](CCCNC(N)=N)C(O)=O	InChI=1S/C8H16N4O3/c1-5(13)12-6(7(14)15)3-2-4-11-8(9)10/h6H,2-4H2,1H3,(H,12,13)(H,14,15)(H4,9,10,11)/t6-/m0/s1	N-Acetyl-arginine	217.129		[M+H]+	positive	12.4	NCBITAXON:http://purl.bioontology.org/ontology/NCBITAXON/9606	Homo sapiens			5:very good reliability							1.16649e+06	1.37895e+06	1.74176e+06	1.21679e+06	2.64898e+06	5.16782e+06	3.54033e+06	3.59181e+06	3.68662e+06	3.44355e+06	2.80043e+06	1.12245e+06	770838	1.39795e+06	2.19794e+06	1.65251e+06	1.18015e+06	2.41117e+06	1.28645e+06	1.00183e+06	852196	4.19366e+06	1.72417e+06	1.39467e+06	2.14379e+06	2.20665e+06	1.73501e+06	2.20715e+06	5.77442e+06
CHEBI:17533	C7H11NO5	CC(=O)N[C@@H](CCC(O)=O)C(O)=O	InChI=1S/C7H11NO5/c1-4(9)8-5(7(12)13)2-3-6(10)11/h5H,2-3H2,1H3,(H,8,9)(H,10,11)(H,12,13)/t5-/m0/s1	N-Acetyl-glutamate	190.071		[M+H]+	positive	11.6	NCBITAXON:http://purl.bioontology.org/ontology/NCBITAXON/9606	Homo sapiens			5:very good reliability							830738	491016	1.35491e+06	626940	663331	570120	617752	425111	2.29115e+06	1.01929e+06	5.38669e+06	5.23129e+06	254038	435476	198220	756152	674377	290620	581526	250386	146907	2.41135e+06	1.29632e+06	791531	663548	1.09319e+06	2.3484e+06	353205	1.16429e+06
CHEBI:16543	C7H14N2O3	CC(=O)N[C@@H](CCCN)C(O)=O	InChI=1S/C7H14N2O3/c1-5(10)9-6(7(11)12)3-2-4-8/h6H,2-4,8H2,1H3,(H,9,10)(H,11,12)/t6-/m0/s1	N-Acetyl-ornithine	175.107		[M+H]+	positive	11.2	NCBITAXON:http://purl.bioontology.org/ontology/NCBITAXON/9606	Homo sapiens			5:very good reliability							759227	7.0152e+06	1.39008e+06	7.82326e+06	1.17031e+06	975180	1.86511e+06	1.16809e+06	3.4087e+06	1.57468e+06	1.47479e+06	551696	1.76827e+06	1.40466e+06	1.09066e+06	901769	712893	644264	691584	1.78289e+06	2.25409e+06	672084	1.62053e+06	1.16473e+06	2.52612e+06	795456	700443	793829	1.87451e+06
CHEBI:35704	C8H16N2O3	CC(=O)N[C@@H](CCCCN)C(O)=O	InChI=1S/C8H16N2O3/c1-6(11)10-7(8(12)13)4-2-3-5-9/h7H,2-5,9H2,1H3,(H,10,11)(H,12,13)/t7-/m0/s1	N2-Acetyl-lysine	189.123		[M+H]+	positive	12.6	NCBITAXON:http://purl.bioontology.org/ontology/NCBITAXON/9606	Homo sapiens			5:very good reliability							359938	428834	1.0845e+06	341705	953366	819217	1.04258e+06	1.19933e+06	999380	2.09584e+06	988179	690999	303483	453841	577457	654007	240322	511894	422874	207749	394890	1.66044e+06	897870	498513	957947	738889	661740	501638	1.74695e+06
CHEBI:17752	C8H16N2O3	CC(=O)NCCCC[C@H](N)C(O)=O	InChI=1S/C8H16N2O3/c1-6(11)10-5-3-2-4-7(9)8(12)13/h7H,2-5,9H2,1H3,(H,10,11)(H,12,13)/t7-/m0/s1	N6-Acetyl-lysine	189.123		[M+H]+	positive	10.5	NCBITAXON:http://purl.bioontology.org/ontology/NCBITAXON/9606	Homo sapiens			5:very good reliability							630502	232501	915475	504555	1.13918e+06	1.66742e+06	944492	1.16083e+06	1.42802e+06	948992	872284	810764	751667	1.03008e+06	926315	1.01853e+06	849930	478102	478859	552681	635552	996285	1.12824e+06	732236	775948	652126	793376	1.10538e+06	973106
CHEBI:15728	C5H11N3O2	NC(=N)NCCCC(O)=O	InChI=1S/C5H11N3O2/c6-5(7)8-3-1-2-4(9)10/h1-3H2,(H,9,10)(H4,6,7,8)	4-Guanidinobutanoate	146.092		[M+H]+	positive	12.6	NCBITAXON:http://purl.bioontology.org/ontology/NCBITAXON/9606	Homo sapiens			5:very good reliability							179630	350935	166229	331965	132886	510643	252858	143714	108334	224548	159578	133236	483469	123802	181120	151397	101179	133213	128577	91251.9	198094	964989	59946	152347	195414	259814	108513	178201	554571
CHEBI:67249	C11H16N4O4	CC(=O)NCCC(=O)N[C@@H](Cc1cnc[nH]1)C(O)=O	InChI=1S/C11H16N4O4/c1-7(16)13-3-2-10(17)15-9(11(18)19)4-8-5-12-6-14-8/h5-6,9H,2-4H2,1H3,(H,12,14)(H,13,16)(H,15,17)(H,18,19)/t9-/m0/s1	Acetylcarnosine	269.124		[M+H]+	positive	7.4	NCBITAXON:http://purl.bioontology.org/ontology/NCBITAXON/9606	Homo sapiens			5:very good reliability							6.05107e+06	2.77233e+06	5.91665e+06	958670	1.4261e+06	2.16888e+06	1.11964e+06	298342	1.03242e+06	1.67125e+06	9.86802e+06	8.54844e+06	2.53158e+06	2.52829e+06	6.27563e+06	4.9658e+06	1.76635e+06	612825	1.66122e+06	1.89126e+06	6.77533e+06	931145	1.24747e+06	2.58183e+06	886779	943692	1.2554e+06	5.63203e+06	1.11955e+06
CHEBI:15682	C10H18N4O6	N[C@@H](CCCNC(=N)NC(CC(O)=O)C(O)=O)C(O)=O	InChI=1S/C10H18N4O6/c11-5(8(17)18)2-1-3-13-10(12)14-6(9(19)20)4-7(15)16/h5-6H,1-4,11H2,(H,15,16)(H,17,18)(H,19,20)(H3,12,13,14)/t5-,6?/m0/s1	Arginino-succinate	291.129		[M+H]+	positive	14.2	NCBITAXON:http://purl.bioontology.org/ontology/NCBITAXON/9606	Homo sapiens			5:very good reliability							533747	526966	201725	198287	509316	444468	335272	260980	752128	574700	369015	399132	296204	193013	307076	499763	548460	168702	282379	251485	180123	367230	222058	581485	163068	248310	276587	307983	498224
CHEBI:15727	C9H14N4O3	NCCC(=O)N[C@@H](Cc1c[nH]cn1)C(O)=O	InChI=1S/C9H14N4O3/c10-2-1-8(14)13-7(9(15)16)3-6-4-11-5-12-6/h4-5,7H,1-3,10H2,(H,11,12)(H,13,14)(H,15,16)/t7-/m0/s1	Carnosine	227.113		[M+H]+	positive	12.9	NCBITAXON:http://purl.bioontology.org/ontology/NCBITAXON/9606	Homo sapiens			5:very good reliability							61949.2	20909.2	55267.1	30241.4	42093.6	11449.1	51036.9	7928.73	18693.9	42839.3	106905	86964.6	149009	73472.3	215126	179277	21507.8	10613	20716	11935.1	116366	60616.4	51263.2	42357	30927.3	46330.9	35590.8	109713	17422.3
CHEBI:18211	C6H13N3O3	NC(CCCNC(N)=O)C(O)=O	InChI=1S/C6H13N3O3/c7-4(5(10)11)2-1-3-9-6(8)12/h4H,1-3,7H2,(H,10,11)(H3,8,9,12)	Citrulline	176.102		[M+H]+	positive	13.1	NCBITAXON:http://purl.bioontology.org/ontology/NCBITAXON/9606	Homo sapiens			5:very good reliability							75700000	68900000	43400000	63900000	95800000	146000000	134000000	117000000	105000000	95500000	76500000	107000000	113000000	89000000	129000000	93000000	64600000	63300000	52000000	51400000	95400000	107000000	91900000	103000000	98000000	89300000	47100000	76600000	100000000
CHEBI:16919	C4H9N3O2	CN(CC(O)=O)C(N)=N	InChI=1S/C4H9N3O2/c1-7(4(5)6)2-3(8)9/h2H2,1H3,(H3,5,6)(H,8,9)	Creatine	132.076		[M+H]+	positive	12.1	NCBITAXON:http://purl.bioontology.org/ontology/NCBITAXON/9606	Homo sapiens			5:very good reliability							25500000	47800000	30800000	76400000	66200000	109000000	59400000	102000000	56400000	84900000	28800000	32400000	24100000	24800000	39100000	90600000	29000000	72400000	36100000	13600000	18000000	53400000	54400000	44800000	40300000	48500000	75400000	36100000	61900000
CHEBI:18089	C9H9NO3	OC(=O)CNC(=O)c1ccccc1	InChI=1S/C9H9NO3/c11-8(12)6-10-9(13)7-4-2-1-3-5-7/h1-5H,6H2,(H,10,13)(H,11,12)	Hippurate	180.065		[M+H]+	positive	4.4	NCBITAXON:http://purl.bioontology.org/ontology/NCBITAXON/9606	Homo sapiens			5:very good reliability							7.51369e+06	9.49001e+06	11300000	16200000	51200000	38700000	87000000	4.28877e+06	14000000	55300000	17800000	1.54898e+06	16400000	48700000	9.88052e+06	209307	81600000	1.20049e+06	8.88629e+06	11000000	20900000	17300000	14200000	543669	28500000	11100000	58300000	11200000	32100000
CHEBI:28683	C10H12N2O3	NC(CC(=O)c1ccccc1N)C(O)=O	InChI=1S/C10H12N2O3/c11-7-4-2-1-3-6(7)9(13)5-8(12)10(14)15/h1-4,8H,5,11-12H2,(H,14,15)	Kynurenine	209.091		[M+H]+	positive	7.9	NCBITAXON:http://purl.bioontology.org/ontology/NCBITAXON/9606	Homo sapiens			5:very good reliability							11000000	7.32114e+06	39800000	9.50422e+06	10300000	21100000	15200000	10800000	10300000	11800000	21900000	19400000	3.5197e+06	14700000	14000000	10600000	7.83683e+06	10400000	9.1275e+06	12400000	10600000	14900000	9.94526e+06	11900000	10300000	11900000	8.04077e+06	13000000	13600000
CHEBI:17287	C4H10N3O5P	CN(CC(O)=O)C(=N)NP(O)(O)=O	InChI=1S/C4H10N3O5P/c1-7(2-3(8)9)4(5)6-13(10,11)12/h2H2,1H3,(H,8,9)(H4,5,6,10,11,12)	Phosphocreatine	212.043		[M+H]+	positive	12.8	NCBITAXON:http://purl.bioontology.org/ontology/NCBITAXON/9606	Homo sapiens			5:very good reliability							2.70143e+06	813097	1.97546e+06	857439	1.17846e+06	1.62485e+06	1.29478e+06	1.33837e+06	682918	440538	1.60863e+06	1.3765e+06	2.41469e+06	3.04409e+06	3.40419e+06	1.72963e+06	1.48709e+06	580309	1.09373e+06	1.10229e+06	1.56549e+06	1.36946e+06	798846	930425	1.02576e+06	1.60107e+06	1.58026e+06	1.23952e+06	1.07118e+06
CHEBI:16680	C14H20N6O5S	N[C@@H](CCSC[C@H]1O[C@H]([C@H](O)[C@@H]1O)n1cnc2c(N)ncnc12)C(O)=O	InChI=1S/C14H20N6O5S/c15-6(14(23)24)1-2-26-3-7-9(21)10(22)13(25-7)20-5-19-8-11(16)17-4-18-12(8)20/h4-7,9-10,13,21-22H,1-3,15H2,(H,23,24)(H2,16,17,18)/t6-,7+,9+,10+,13+/m0/s1	S-Adenosyl-homocysteine	385.128		[M+H]+	positive	11.2	NCBITAXON:http://purl.bioontology.org/ontology/NCBITAXON/9606	Homo sapiens			5:very good reliability							0	147470	29233.7	181125	0	26104	0	0	29573.5	17145.1	0	24376.2	0	0	0	9305.95	0	0	0	15899.8	0	0	18150.3	0	19350.1	0	7612.85	10242	36335
CHEBI:15414	C15H23N6O5S+	C[S+](CC[C@H](N)C(O)=O)C[C@H]1O[C@H]([C@H](O)[C@@H]1O)n1cnc2c(N)ncnc12	InChI=1S/C15H22N6O5S/c1-27(3-2-7(16)15(24)25)4-8-10(22)11(23)14(26-8)21-6-20-9-12(17)18-5-19-13(9)21/h5-8,10-11,14,22-23H,2-4,16H2,1H3,(H2-,17,18,19,24,25)/p+1/t7-,8+,10+,11+,14+,27?/m0/s1	S-Adenosyl-methionine	399.144		[M+H]+	positive	13.7	NCBITAXON:http://purl.bioontology.org/ontology/NCBITAXON/9606	Homo sapiens			5:very good reliability							257254	97313.3	248292	135852	28987.2	98777.1	30032.6	27206.1	193477	170144	198046	177801	19919.6	19408.2	41238.8	12980.9	210295	142277	148080	119446	153651	263404	154162	150744	42080.5	48903.5	54993.8	54641	51650.3
CHEBI:73024	C9H17NO4	CC(=O)OC(CC([O-])=O)C[N+](C)(C)C	InChI=1S/C9H17NO4/c1-7(11)14-8(5-9(12)13)6-10(2,3)4/h8H,5-6H2,1-4H3	Acetyl-carnitine	204.123		[M+H]+	positive	8.5	NCBITAXON:http://purl.bioontology.org/ontology/NCBITAXON/9606	Homo sapiens			5:very good reliability							340000000	287000000	284000000	182000000	223000000	282000000	162000000	48600000	279000000	226000000	201000000	304000000	97800000	194000000	109000000	167000000	205000000	492000000	401000000	324000000	412000000	505000000	375000000	421000000	354000000	133000000	169000000	246000000	143000000
CHEBI:7676	C11H21NO4	CCCC(=O)OC(CC([O-])=O)C[N+](C)(C)C	InChI=1S/C11H21NO4/c1-5-6-11(15)16-9(7-10(13)14)8-12(2,3)4/h9H,5-8H2,1-4H3	Butyryl-carnitine	232.154		[M+H]+	positive	6.2	NCBITAXON:http://purl.bioontology.org/ontology/NCBITAXON/9606	Homo sapiens			5:very good reliability							19800000	17100000	37100000	30500000	35900000	42400000	24800000	5.46632e+06	65500000	31000000	52300000	34900000	24300000	23800000	30500000	16300000	18300000	25700000	20400000	47900000	27400000	37200000	37800000	39800000	26900000	17300000	31100000	38300000	39600000
CHEBI:17126	C7H15NO3	C[N+](C)(C)CC(O)CC([O-])=O	InChI=1S/C7H15NO3/c1-8(2,3)5-6(9)4-7(10)11/h6,9H,4-5H2,1-3H3	Carnitine	162.112		[M+H]+	positive	10.9	NCBITAXON:http://purl.bioontology.org/ontology/NCBITAXON/9606	Homo sapiens			5:very good reliability							453000000	628000000	524000000	412000000	599000000	690000000	641000000	216000000	369000000	470000000	491000000	531000000	547000000	637000000	556000000	549000000	338000000	547000000	364000000	337000000	357000000	566000000	590000000	539000000	509000000	432000000	605000000	619000000	572000000
CHEBI:68830	C17H33NO4	O(C(C[N+](C)(C)C)CC([O-])=O)C(CCCCCCCCC)=O	InChI=1S/C17H33NO4/c1-5-6-7-8-9-10-11-12-17(21)22-15(13-16(19)20)14-18(2,3)4/h15H,5-14H2,1-4H3	Decanoyl-carnitine	316.248		[M+H]+	positive	4.3	NCBITAXON:http://purl.bioontology.org/ontology/NCBITAXON/9606	Homo sapiens			5:very good reliability							103000000	101000000	119000000	44900000	94800000	113000000	23800000	58100000	123000000	105000000	61200000	102000000	132000000	95500000	287000000	82700000	61600000	140000000	258000000	97600000	232000000	147000000	164000000	126000000	84900000	19700000	43500000	789000000	65800000
CHEBI:73054	C19H37NO4	CCCCCCCCCCCC(=O)OC(CC([O-])=O)C[N+](C)(C)C	InChI=1S/C19H37NO4/c1-5-6-7-8-9-10-11-12-13-14-19(23)24-17(15-18(21)22)16-20(2,3)4/h17H,5-16H2,1-4H3	Dodecanoyl-carnitine	344.279		[M+H]+	positive	4	NCBITAXON:http://purl.bioontology.org/ontology/NCBITAXON/9606	Homo sapiens			5:very good reliability							25900000	19200000	21100000	11500000	8.43561e+06	14000000	1.96882e+06	6.82869e+06	23000000	27900000	17700000	23700000	27700000	20800000	33100000	18000000	4.75367e+06	20500000	31700000	12300000	43400000	11800000	35100000	39100000	23300000	4.75082e+06	8.54699e+06	132000000	15200000
CHEBI:70749	C13H25NO4	C(OC(CCCCC)=O)(C[N+](C)(C)C)CC(=O)[O-]	InChI=1S/C13H25NO4/c1-5-6-7-8-13(17)18-11(9-12(15)16)10-14(2,3)4/h11H,5-10H2,1-4H3	Hexanoyl-carnitine	260.185		[M+H]+	positive	4.8	NCBITAXON:http://purl.bioontology.org/ontology/NCBITAXON/9606	Homo sapiens			5:very good reliability							11700000	12100000	19400000	7.76406e+06	13400000	16400000	5.72552e+06	4.53951e+06	26700000	12600000	9.00113e+06	15300000	10000000	11900000	19700000	12500000	8.69881e+06	19400000	26500000	10100000	22000000	30100000	22500000	20900000	15400000	4.91048e+06	5.67399e+06	88500000	10200000
CHEBI:73025	C12H23NO4	CC(C)CC(=O)OC(CC([O-])=O)C[N+](C)(C)C	InChI=1S/C12H23NO4/c1-9(2)6-12(16)17-10(7-11(14)15)8-13(3,4)5/h9-10H,6-8H2,1-5H3	Isovaleryl-carnitine	246.169		[M+H]+	positive	5.5	NCBITAXON:http://purl.bioontology.org/ontology/NCBITAXON/9606	Homo sapiens			5:very good reliability							16700000	13300000	29400000	14800000	21700000	30600000	12900000	836000000	21900000	31900000	24500000	33200000	17300000	16700000	25100000	13100000	13200000	18800000	11400000	13700000	20500000	22800000	22800000	15700000	25400000	12600000	18300000	21500000	45100000
CHEBI:73039	C15H29NO4	CCCCCCCC(=O)OC(CC([O-])=O)C[N+](C)(C)C	InChI=1S/C15H29NO4/c1-5-6-7-8-9-10-15(19)20-13(11-14(17)18)12-16(2,3)4/h13H,5-12H2,1-4H3	Octanoyl-carnitine	288.216		[M+H]+	positive	4.4	NCBITAXON:http://purl.bioontology.org/ontology/NCBITAXON/9606	Homo sapiens			5:very good reliability							43800000	44600000	45000000	13900000	41600000	48200000	12300000	22300000	50000000	41800000	23000000	30300000	45600000	39900000	106000000	35200000	33900000	62300000	101000000	30800000	86900000	62700000	60900000	58100000	39500000	10400000	15600000	313000000	29900000
CHEBI:28867	C10H19NO4	CCC(=O)OC(CC([O-])=O)C[N+](C)(C)C	InChI=1S/C10H19NO4/c1-5-10(14)15-8(6-9(12)13)7-11(2,3)4/h8H,5-7H2,1-4H3	Propionyl-carnitine	218.138		[M+H]+	positive	7.2	NCBITAXON:http://purl.bioontology.org/ontology/NCBITAXON/9606	Homo sapiens			5:very good reliability							34700000	31700000	30800000	23700000	49800000	30500000	38800000	5.06408e+06	38600000	39400000	48400000	52800000	24800000	23700000	27300000	22000000	20900000	36800000	21500000	19600000	24300000	68000000	48600000	40000000	28300000	24700000	35400000	30000000	41700000
CHEBI:73061	C21H41NO4	CCCCCCCCCCCCCC(=O)OC(CC([O-])=O)C[N+](C)(C)C	InChI=1S/C21H41NO4/c1-5-6-7-8-9-10-11-12-13-14-15-16-21(25)26-19(17-20(23)24)18-22(2,3)4/h19H,5-18H2,1-4H3	Tetradecanoyl-carnitine	372.31		[M+H]+	positive	3.7	NCBITAXON:http://purl.bioontology.org/ontology/NCBITAXON/9606	Homo sapiens			5:very good reliability							770551	425578	490484	766711	213936	246780	318687	260200	908119	1.17182e+06	807499	712455	478879	503923	684970	651342	286129	291311	300408	273892	452357	328711	909612	1.22553e+06	842892	207211	439582	1.70625e+06	1.06666e+06
CHEBI:16436	C14H26N4O11P2	C[N+](C)(C)CCOP([O-])(=O)OP(O)(=O)OC[C@H]1O[C@H]([C@H](O)[C@@H]1O)n1ccc(N)nc1=O	InChI=1S/C14H26N4O11P2/c1-18(2,3)6-7-26-30(22,23)29-31(24,25)27-8-9-11(19)12(20)13(28-9)17-5-4-10(15)16-14(17)21/h4-5,9,11-13,19-20H,6-8H2,1-3H3,(H3-,15,16,21,22,23,24,25)/t9-,11-,12-,13-/m1/s1	CDP-choline	489.113		[M+H]+	positive	13	NCBITAXON:http://purl.bioontology.org/ontology/NCBITAXON/9606	Homo sapiens			5:very good reliability							15800000	8.11944e+06	22200000	6.46774e+06	15100000	11700000	9.32873e+06	3.85854e+06	5.90908e+06	10800000	25900000	43000000	31000000	9.29184e+06	25900000	16200000	25700000	5.30562e+06	9.40105e+06	5.2263e+06	19200000	23100000	10700000	8.08397e+06	2.45428e+06	19900000	29300000	11000000	9.77588e+06
CHEBI:16732	C11H20N4O11P2	NCCOP(O)(=O)OP(O)(=O)OC[C@H]1O[C@H]([C@H](O)[C@@H]1O)n1ccc(N)nc1=O	InChI=1S/C11H20N4O11P2/c12-2-4-23-27(19,20)26-28(21,22)24-5-6-8(16)9(17)10(25-6)15-3-1-7(13)14-11(15)18/h1,3,6,8-10,16-17H,2,4-5,12H2,(H,19,20)(H,21,22)(H2,13,14,18)/t6-,8-,9-,10-/m1/s1	CDP-ethanolamine	447.067		[M+H]+	positive	13.8	NCBITAXON:http://purl.bioontology.org/ontology/NCBITAXON/9606	Homo sapiens			5:very good reliability							969058	355588	1.63831e+06	489056	804415	1.31737e+06	746559	95873.4	505938	600634	744069	1.44804e+06	1.55939e+06	742682	1.26687e+06	1.09092e+06	1.14547e+06	361270	1.03688e+06	432578	812038	1.07826e+06	1.17101e+06	524577	186454	819544	2.41424e+06	1.05385e+06	590397
CHEBI:16870	C8H20NO6P	C[N+](C)(C)CCOP([O-])(=O)OC[C@H](O)CO	InChI=1S/C8H20NO6P/c1-9(2,3)4-5-14-16(12,13)15-7-8(11)6-10/h8,10-11H,4-7H2,1-3H3/t8-/m1/s1	Glycerophosphocholine	258.109		[M+H]+	positive	12.2	NCBITAXON:http://purl.bioontology.org/ontology/NCBITAXON/9606	Homo sapiens			5:very good reliability							42100000	41400000	37000000	37600000	38600000	45500000	41200000	22000000	18800000	32800000	38300000	63200000	61400000	48700000	42800000	54200000	45400000	30800000	38800000	30500000	40900000	53100000	48700000	38300000	15800000	32900000	67000000	57900000	32400000
CHEBI:4828	C9H15N3O2S	C[N+](C)(C)[C@@H](Cc1c[nH]c(S)n1)C([O-])=O	InChI=1S/C9H15N3O2S/c1-12(2,3)7(8(13)14)4-6-5-10-9(15)11-6/h5,7H,4H2,1-3H3,(H2-,10,11,13,14,15)/t7-/m0/s1	Ergothioneine	230.095		[M+H]+	positive	12.2	NCBITAXON:http://purl.bioontology.org/ontology/NCBITAXON/9606	Homo sapiens			5:very good reliability							2.89558e+06	9.73862e+06	7.61601e+06	39700000	13300000	2.53158e+06	17700000	8.50372e+06	1.97848e+06	10100000	10700000	5.71786e+06	10400000	10300000	7.54678e+06	14900000	15000000	4.09083e+06	36300000	13100000	6.87148e+06	11900000	30300000	11200000	86300000	1.65544e+06	8.88857e+06	5.83264e+06	12700000
CHEBI:17858	C20H32N6O12S2	N[C@@H](CCC(=O)N[C@@H](CSSC[C@H](NC(=O)CC[C@H](N)C(O)=O)C(=O)NCC(O)=O)C(=O)NCC(O)=O)C(O)=O	InChI=1S/C20H32N6O12S2/c21-9(19(35)36)1-3-13(27)25-11(17(33)23-5-15(29)30)7-39-40-8-12(18(34)24-6-16(31)32)26-14(28)4-2-10(22)20(37)38/h9-12H,1-8,21-22H2,(H,23,33)(H,24,34)(H,25,27)(H,26,28)(H,29,30)(H,31,32)(H,35,36)(H,37,38)/t9-,10-,11-,12-/m0/s1	Glutathione disulfide (GSSG)	613.158		[M+H]+	positive	15	NCBITAXON:http://purl.bioontology.org/ontology/NCBITAXON/9606	Homo sapiens			5:very good reliability							2.59224e+06	1.34514e+06	3.6113e+06	2.57525e+06	875014	1.31803e+06	1.15747e+06	662364	205595	1.11163e+06	1.90419e+06	2.79541e+06	2.00502e+06	1.37883e+06	2.73265e+06	2.12056e+06	2.55479e+06	1.04009e+06	2.30661e+06	2.01754e+06	2.07631e+06	1.62673e+06	2.20797e+06	678193	113741	870283	2.1727e+06	2.89897e+06	740363
CHEBI:84058	C11H19N3O6	CC[C@H](NC(=O)CC[C@H](N)C(O)=O)C(=O)NCC(O)=O	InChI=1S/C11H19N3O6/c1-2-7(10(18)13-5-9(16)17)14-8(15)4-3-6(12)11(19)20/h6-7H,2-5,12H2,1H3,(H,13,18)(H,14,15)(H,16,17)(H,19,20)/t6-,7-/m0/s1	Ophthalmic acid	290.134		[M+H]+	positive	11.4	NCBITAXON:http://purl.bioontology.org/ontology/NCBITAXON/9606	Homo sapiens			5:very good reliability							519461	0	104540	0	42885.8	34983.4	43133.7	12285	34358.7	63022.7	34684.1	79786.6	32191.7	42468.1	87726.8	27576	18320.3	34901	86905.4	7224.68	518088	29655.1	65889.9	99548	8071.95	19103.5	36889.6	127873	18294.7
CHEBI:42334	C8H18N2O4S	OCCN1CCN(CC1)CCS(O)(=O)=O	InChI=1S/C8H18N2O4S/c11-7-5-9-1-3-10(4-2-9)6-8-15(12,13)14/h11H,1-8H2,(H,12,13,14)	HEPES [M+H]+	239.105		[M+H]+	positive	8.2	NCBITAXON:http://purl.bioontology.org/ontology/NCBITAXON/9606	Homo sapiens			5:very good reliability							387000000	370000000	612000000	258000000	389000000	437000000	367000000	370000000	259000000	245000000	464000000	534000000	384000000	624000000	484000000	504000000	389000000	317000000	331000000	334000000	313000000	368000000	426000000	320000000	316000000	418000000	451000000	508000000	296000000
CHEBI:39033	C8H18N2O6S2	C1CN(CCN1CCS(=O)(=O)O)CCS(=O)(=O)O	InChI=1S/C8H18N2O6S2/c11-17(12,13)7-5-9-1-2-10(4-3-9)6-8-18(14,15)16/h1-8H2,(H,11,12,13)(H,14,15,16)	PIPES [M+H]+	303.067		[M+H]+	positive	11.9	NCBITAXON:http://purl.bioontology.org/ontology/NCBITAXON/9606	Homo sapiens			5:very good reliability							35500000	27100000	36200000	28600000	29200000	31200000	31900000	31900000	27500000	33400000	33800000	35900000	26400000	34200000	26900000	37700000	38500000	32800000	37600000	34500000	29100000	29500000	27700000	32800000	33800000	27200000	34700000	26800000	32600000
[truncated: 1 more columns]

## Sheet: Metabolite_Gini
Metabolite	Gini_coefficient
Trimethyl-tyrosine	0.895255
4-Aminobenzoate	0.827452
S-Adenosyl-homocysteine	0.756052
Trimethyl-tryptophan (hypaphorine)	0.721458
Isovaleryl-carnitine	0.624507
Ophthalmic acid	0.59532
Dimethyl-proline (stachydrine)	0.519625
Trimethyl-phenylalanine	0.499227
Hippurate	0.494691
N-Acetyl-glutamate	0.482703
Caffeine	0.47198
Ergothioneine	0.456774
Trimethyl-histidine (hercynine)	0.452987
Acetylcarnosine	0.442755
Carnosine	0.433576
Tetradecanoyl-carnitine	0.428593
Dodecanoyl-carnitine	0.407043
Nicotinamide	0.398313
Decanoyl-carnitine	0.393659
N-Acetyl-ornithine	0.392246
Methyl-lysine	0.390839
S-Adenosyl-methionine	0.383296
Octanoyl-carnitine	0.382315
Pantothenate	0.362167
Dimethyl-xanthine	0.358212
CDP-choline	0.353347
IMP	0.352945
4-Guanidinobutanoate	0.352638
Hexanoyl-carnitine	0.350401
S-Methyl-ergothioneine	0.332559
N-Acetyl-D-glucosamine	0.322547
N2-Acetyl-lysine	0.315401
UDP	0.31218
AMP	0.311112
GDP-glucose	0.310315
N-Acetylisoleucine	0.305105
N-Acetylleucine	0.305105
CDP-ethanolamine	0.303494
N-Acetyl-arginine	0.303211
CTP	0.29743
ADP	0.296816
GTP	0.291414
Glutathione disulfide (GSSG)	0.28526
Dimethyl-lysine	0.279109
Adenosine	0.275043
Creatine	0.273866
Betaine	0.264037
Glucosamine	0.254011
Phosphocreatine	0.250329
Acetyl-carnitine	0.247555
NAD+	0.241331
Arginino-succinate	0.232063
Trimethyl-lysine	0.226173
Kynurenine	0.222848
Butyro-betaine	0.214677
ATP	0.21108
Butyryl-carnitine	0.210703
Adenine	0.20747
Propionyl-carnitine	0.204961
Dimethyl-guanosine	0.197517
N6-Acetyl-lysine	0.19428
1-Methyl-adenosine	0.188984
Cytidine	0.186603
Dimethyl-arginine	0.172294
Glycerophosphocholine	0.171666
Citrulline	0.164351
alpha-methylhistidine	0.15169
1-methylhistidine	0.15169
3-methylhistidine	0.15169
N(alpha)-methyl-L-histidine	0.15169
histidine methyl ester	0.15169
Arginine	0.149494
Tryptophan	0.146363
Tyrosine	0.133159
HEPES [M+H]+	0.132911
1-Methyl-guanosine	0.126214
Carnitine	0.120279
Histidine	0.11583
Phenylalanine	0.0936332
PIPES [M+H]+	0.0643239
NADP+

## Sheet: Ergothioneine_by_individual
Individual	elder/youth	Ergothioneine
Person01_plasma_youth_POS	youth	2.89558e+06
Person02_plasma_youth_POS	youth	9.73862e+06
Person03_plasma_youth_POS	youth	7.61601e+06
Person04_plasma_youth_POS	youth	39700000
Person11_plasma_youth_POS	youth	10700000
Person12_plasma_youth_POS	youth	5.71786e+06
Person13_plasma_youth_POS	youth	10400000
Person14_plasma_youth_POS	youth	10300000
Person15_plasma_youth_POS	youth	7.54678e+06
Person16_plasma_youth_POS	youth	14900000
Person17_plasma_youth_POS	youth	15000000
Person20_plasma_youth_POS	youth	13100000
Person21_plasma_youth_POS	youth	6.87148e+06
Person27_plasma_youth_POS	youth	8.88857e+06
Person28_plasma_youth_POS	youth	5.83264e+06
Person05_plasma_elder_POS	elder	13300000
Person06_plasma_elder_POS	elder	2.53158e+06
Person07_plasma_elder_POS	elder	17700000
Person08_plasma_elder_POS	elder	8.50372e+06
Person09_plasma_elder_POS	elder	1.97848e+06
Person10_plasma_elder_POS	elder	10100000
Person18_plasma_elder_POS	elder	4.09083e+06
Person19_plasma_elder_POS	elder	36300000
Person22_plasma_elder_POS	elder	11900000
Person23_plasma_elder_POS	elder	30300000
Person24_plasma_elder_POS	elder	11200000
Person25_plasma_elder_POS	elder	86300000
Person26_plasma_elder_POS	elder	1.65544e+06
Person29_plasma_elder_POS	elder	12700000
Person30_plasma_elder_POS	elder	8.88631e+06
